# Supplementary material for: Dynamical drivers of free-tropospheric ozone increases over equatorial Southeast Asia
Source: Copernicus journal article supplement (doi:10.5194/egusphere-2023-2618), 2023-12-04
Supplement: Supplementary file [file egusphere-2023-2618-AC2-supplement.pdf]

***Note: Author responses are in blue, italicized text.***

This is a well-motivated and well-focused manuscript that investigates trends in tropospheric ozone from ozonesonde observations at two stations in equatorial Southeast Asia and their association with concomitant changes in observed convection (as deduced from multiple remotely sensed cloud metrics and environmental proxies). This was one of the most polished papers I've received in review and I enjoyed reading it from start to finish. I applaud the authors for their crafting of an excellent narrative with appropriate concision, clear goals, and unexaggerated interpretations. The figure quality was also superb and each well justified and discussed. Congratulations on a wonderful effort that I believe is ready to be published as is, with only a single technical correction - "trends" on line 89 should be "trend".

***Thank you for the encouraging words on our manuscript. We have made the technical correction listed above. You may wish to also peruse our responses to the other two sets of comments, which contain further evidence of the so-called "ozone/convection tuning knob" and that trends in convection are a primary driver of the 25-year positive free-tropospheric ozone trends above Equatorial Southeast Asia.***
